# Supplementary material
Source: HighWire-hosted journal article supplement (https://www.rcpjournals.org/highwire/filestream/11647/field_highwire_adjunct_files/1/Hockey_Supplementary_material_S2.pdf)
Supplement: Hockey_Supplementary_material_S2.pdf [file Hockey_Supplementary_material_S2.pdf]

**OLS marginal effect on intensity on net feelings associated with task categories**

| <b>Task</b>                                   | <b>Net Affect</b>         | <b>Standard Error</b> | <b>95% Confidence Interval</b> |        |
|-----------------------------------------------|---------------------------|-----------------------|--------------------------------|--------|
| Clinical - Patient Facing (1 = yes, 0 = no)   | -0.727***                 | 0.15                  | -1.017                         | -0.437 |
| Clinical - IT Facing (1 = yes, 0 = no)        | -1.761***                 | 0.15                  | -2.058                         | -1.464 |
| Research & Learning (1 = yes, 0 = no)         | -0.581**                  | 0.19                  | -0.962                         | -0.200 |
| Clinical – Colleague Facing (1 = yes, 0 = no) | -0.904***                 | 0.15                  | -1.196                         | -0.612 |
| Paperwork and Requests (1 = yes, 0 = no)      | -2.140***                 | 0.16                  | -2.452                         | -1.828 |
| Commuting (1 = yes, 0 = no)                   | -1.316***                 | 0.34                  | -1.978                         | -0.653 |
| Ward Round (1 = yes, 0 = no)                  | -1.875***                 | 0.21                  | -2.285                         | -1.465 |
| Staff meetings (1 = yes, 0 = no)              | -0.241                    | 0.20                  | -0.626                         | 0.145  |
| Theatre (1 = yes, 0 = no)                     | -0.795*                   | 0.35                  | -1.474                         | -0.115 |
| Break (1 = yes, 0 = no)                       | <i>Reference category</i> |                       |                                |        |

Note: Controlled for gender, training level (core, foundation, other), years in training, age, marital status, survey time (minutes since start of shift, hour of the day). \*\*\*  $p \leq .001$ ; \*\*  $p \leq .01$ ; \*  $p \leq .1$ . Standard errors were clustered at the respondent level. Number of observations (tasks) = 5,628
